1 **A conserved function for pericentromeric satellite DNA**

2 Madhav Jagannathan<sup>1</sup>, Ryan Cummings<sup>1, 3</sup>, Yukiko M. Yamashita<sup>1, 2, 3, \*</sup>

3 <sup>1</sup>Life Sciences Institute, University of Michigan.

4 <sup>2</sup>Department of Cell and Developmental Biology, University of Michigan.

5 <sup>3</sup>Howard Hughes Medical Institute.

6 \*Correspondence to: [yukikomy@umich.edu](mailto:yukikomy@umich.edu)

7

8 **Abstract:**

9           A universal and unquestioned characteristic of eukaryotic cells is that the genome is  
10 divided into multiple chromosomes and encapsulated in a single nucleus. However, the  
11 underlying mechanism to ensure such a configuration is unknown. Here we provide evidence  
12 that pericentromeric satellite DNA, which is often regarded as junk, is a critical constituent of the  
13 chromosome, allowing the packaging of all chromosomes into a single nucleus. We show that  
14 the multi AT-hook satellite DNA binding proteins, *D. melanogaster* D1 and mouse HMGA1,  
15 play an evolutionarily conserved role in bundling pericentromeric satellite DNA from  
16 heterologous chromosomes into ‘chromocenters’, a cytological association of pericentromeric  
17 heterochromatin. Defective chromocenter formation leads to micronuclei formation due to  
18 budding off of interphase nucleus and cell death. We propose that chromocenter and satellite  
19 DNA serves a fundamental role to achieve the universal characteristic of eukaryotic cells: full  
20 complement of the genome within a single nucleus.

21

## 22 Introduction

23 Satellite DNA is AT-rich, non-coding, repetitive DNA that is abundant in centromeric  
24 and pericentromeric heterochromatin. Unlike centromeric satellite DNA, whose function in  
25 kinetochore formation and thus chromosome segregation is well established (Willard, 1990; Sun  
26 et al., 1997; 2003), the role of pericentromeric satellite DNA remains obscure: although function  
27 for a few satellite DNA repeats has been implied in certain cellular processes such as meiotic  
28 segregation of achiasmatic chromosomes, X chromosome dosage compensation and formation of  
29 lampbrush-like loops on the Y chromosome during male meiosis (Yunis and Yasmineh, 1971;  
30 Dernburg et al., 1996; Bonaccorsi et al., 1990; Menon et al., 2014), a unifying theme for  
31 pericentromeric satellite DNA function remains elusive. Moreover, highly divergent satellite  
32 DNA sequences even among closely-related species has led to the idea that satellite DNA does  
33 not serve a conserved function and is mostly a selfish element or junk (Doolittle and Sapienza,  
34 1980; Walker, 1971). Pericentromeric satellite DNA repeats are proposed to be sources of  
35 genomic instability, as their misexpression is associated with the formation of genotoxic R-loops  
36 and DNA damage (Zeller et al., 2016; Zhu et al., 2011; Zeller and Gasser, 2017). Most studies on  
37 pericentromeric heterochromatin have focused on the mechanisms to repress satellite DNA, and  
38 accordingly, a rationale for the very existence of pericentromeric satellite DNA is still lacking.

39

40 Cytologically, it is well documented that pericentromeric satellite DNA from multiple  
41 chromosomes is clustered into chromocenters in interphase nuclei in diverse eukaryotes  
42 including *Drosophila*, mouse and plants (Figure 1A) (Pardue and Gall, 1970; Fransz et al.,  
43 2002). While multiple factors such as epigenetic modifications and transcription of repetitive  
44 DNA from pericentromeric DNA sequences are known to be required for chromocenter  
45 formation (Probst et al., 2010; Hahn et al., 2013; Bulut-Karslioglu et al., 2012; Peters et al.,  
46 2001; Pinheiro et al., 2012), the ultimate consequences of disrupted chromocenter formation has  
47 never been addressed, leaving the function of chromocenters unknown.

48

49 In this study, we explored the role of pericentromeric satellite DNA/chromocenters by  
50 studying multi-AT-hook proteins, D1 from *Drosophila melanogaster* and HMGA1 from mouse.  
51 D1 and HMGA1 are known to bind specific pericentromeric satellite DNA, and we show that

52 these proteins are required for chromocenter formation. When chromocenters are disrupted in the  
53 absence of these proteins, cells exhibited a high frequency of micronuclei formation, leading to  
54 DNA breakage and cell death. We show that micronuclei are formed during interphase, by  
55 budding off the nucleus. We further show that D1 binding to target DNA sequence is sufficient  
56 to bring it to chromocenter. High-resolution imaging revealed chromatin threads positive for  
57 D1/HMGA proteins and satellite DNA that connect heterologous chromosomes. Taken together,  
58 we propose that chromocenter formation via bundling of satellite DNA from heterologous  
59 chromosomes functions as a mechanism to encapsulate the full complement of the genome into a  
60 single nucleus, and that satellite DNA is a critical constituent of the chromosome, serving an  
61 evolutionary conserved role.

62

## 63 **Results**

### 64 **The multi-AT-hook proteins, *Drosophila* D1 and mouse HMGA1, bind satellite DNA and** 65 **localize to chromocenters.**

66 D1 in *Drosophila melanogaster* and HMGA1 in mouse are multi-AT-hook proteins,  
67 which are known to bind the *Drosophila* {AATAT}<sub>n</sub> satellite DNA (~8% of the *Drosophila* male  
68 genome) and mouse major satellite DNA (~6% of the mouse genome), respectively (Levinger  
69 and Varshavsky, 1982b; a; Rodriguez Alfageme et al., 1980; Lund et al., 1983; Goodwin et al.,  
70 1973). The {AATAT}<sub>n</sub> satellite is distributed across 11 loci on multiple chromosomes as  
71 visualized by DNA FISH on mitotic chromosome spreads (**Figure 1B**) (Jagannathan et al., 2017).  
72 However, it is typically clustered into a few foci in *Drosophila* interphase nuclei, colocalizing  
73 with D1 protein (**Figure 1C**). The D1/{AATAT}<sub>n</sub> foci stained positively for H3K9me2 in  
74 interphase nuclei (**Figure 1C**), a well-established characteristic of constitutive  
75 heterochromatin/chromocenters (Guenatri et al., 2004). Consistently, D1 localization on the  
76 mitotic chromosome spread showed its localization near the centromere marked by *Drosophila*  
77 CENP-A, Cid (**Figure 1D**). These results suggest that D1 is a chromocenter-localizing protein,  
78 via its binding to the {AATAT}<sub>n</sub> satellite DNA.

79

80 The mouse HMGA1 protein was originally identified as an abundant non-histone  
81 component of mammalian chromatin (Goodwin et al., 1973; Lund et al., 1983) with subsequent  
82 studies demonstrating its binding to satellite DNA (Strauss and Varshavsky, 1984; Radic et al.,  
83 1992). Mouse major satellite, which is present in pericentromeric regions of all chromosomes  
84 (Figure 1E) (Lyon and Searle, 1989), clustered into DAPI-dense chromocenters positive for  
85 HMGA1 protein (Figure 1F, Figure 1, figure supplement 1A, B), revealing an analogous  
86 relationship to D1/{AATAT}<sub>n</sub> satellite in *Drosophila*. Interestingly, we found that *Drosophila*  
87 D1 protein localizes to major satellite/chromocenters when ectopically expressed in multiple  
88 mouse cell lines (Figure 1G, Figure 1-figure supplement 1C, D), suggesting that D1 and  
89 HMGA1 may possess an orthologous and conserved function as satellite DNA/chromocenter-  
90 binding proteins.

91

## 92 **D1 and HMGA1 are required for organizing chromocenters**

93 We next examined the effects of *D1* mutation and siRNA-mediated knockdown of  
94 HMGA1 on chromocenters. We used two *D1* alleles, *D1*<sup>LL03310</sup> and *D1*<sup>EY05004</sup>, which we show to  
95 be protein null alleles, evidenced by near-complete loss of anti-D1 antibody staining (Figure 1-  
96 figure supplement 2A-C). When these alleles were combined with the D1 deficiency allele,  
97 Df(3R)BSC666, it led to severe declustering of {AATAT}<sub>n</sub> satellite DNA (Figure 1H-J, Figure  
98 1-figure supplement 2D-E), suggesting that D1 is required for clustering of pericentromeric  
99 satellite DNA into chromocenters. We observed D1's requirement for chromocenter formation in  
100 multiple cell types (Figure 1-figure supplement 2F-I), but we largely focused on spermatogonial  
101 cells, where the phenotypes (such as cell death) were most penetrant and severe.

102

103 We also examined the requirement for HMGA1 in mouse chromocenter formation.  
104 Following siRNA-mediated knockdown of HMGA1, which led to near complete loss of HMGA1  
105 protein (see Figure 2D, E and Figure 2-figure supplement 1A-B, D-E for efficiencies of HMGA1  
106 knockdown), we observed chromocenter disruption in multiple mouse cell lines (Figure 1K-M,  
107 Figure 1-figure supplement 2J-L). These results suggest that D1 and HMGA1 have an  
108 orthologous function to organize pericentromeric satellite DNA into chromocenters.

109

## 110 **Loss of D1/HMGA1 leads to micronuclei formation.**

111 To explore the function of chromocenters and satellite DNA, we examined the effects of  
112 *DI* mutation/HMGA1 knockdown, which showed strikingly similar phenotypes. We found that  
113 *DI* mutation as well as siRNA-mediated HMGA1 knockdown in multiple mouse cell lines  
114 resulted in a significant increase in micronuclei formation ([Figure 2A-F](#), [Figure 2-figure](#)  
115 [supplement1A-F](#)).

116

117 Micronuclei are known to have compromised nuclear envelope integrity, leading to DNA  
118 damage and catastrophic chromosomal rearrangement therein (Crasta et al., 2012; Hatch et al.,  
119 2013). Therefore, we first examined a possible defect in nuclear envelope integrity in *DI* mutant.  
120 We found that loss of D1 led to breaching of nuclear envelope both in major and micronuclei,  
121 visualized by the cytoplasmic leakage of nuclear GFP (nlsGFP) ([Figure 2G-I](#)), suggesting that  
122 nuclear envelope integrity might be generally compromised. Consistently, we observed  
123 mislocalization of nuclear envelope proteins in *DI* mutant spermatogonia. We frequently  
124 observed that lamin often surrounded the nucleus incompletely in *DI* mutant (1.9% in control  
125 (n=52) and 68.9% in *DI* mutant (n=58)) ([Figure 2J, K](#), arrows indicate lamin-negative regions on  
126 the nuclear membrane). We also observed cytoplasmic ‘holes’, which resemble the nucleus in  
127 that they exclude cytoplasmic proteins such as Vasa ([Figure 2K](#), arrowhead), but are devoid of  
128 nuclear lamin ([Figure 2K](#), arrowhead). These ‘holes’ were often surrounded by an ER marker,  
129 which normally surrounds the nuclear envelope ([Figure 2J](#)) (Dorn et al., 2011). Similarly, Otefin,  
130 an inner nuclear membrane LEM-domain protein (Barton et al., 2014), also showed perturbed  
131 localization (2.7% in control (n=109) and 24.5% in *DI* mutant (n=106)) ([Figure 2L, M](#), arrows  
132 indicate lamin/Otefin negative regions on the nuclear envelope while the arrowhead indicates  
133 Otefin-positive micronuclei). Taken together, these results show that *DI* mutant cells exhibit  
134 compromised nuclear envelope integrity, which is associated with micronuclei formation.

135

## 136 **Loss of D1/HMGA1 leads to accumulation of DNA damage**

137 It has been shown that defects in nuclear envelope integrity can lead to extensive DNA  
138 damage in the major nucleus and micronuclei (Raab et al., 2016; Denais et al., 2016; Zhang et  
139 al., 2015; Crasta et al., 2012; Hatch et al., 2013). Nuclear envelope defects and extensive DNA  
140 damages there in lead to catastrophic chromosomal breaks/rearrangements termed  
141 chromothripsis (Crasta et al., 2012; Hatch et al., 2013). Such catastrophic DNA  
142 breaks/rearrangements are speculated to lead to tumorigenesis (Hatch and Hetzer, 2015).

143  
144 Consistent with defective nuclear envelope integrity, we observed extensive DNA  
145 damages in both major and micronuclei (Figure 3A-F, arrows point to damaged DNA in  
146 micronuclei in B and D). Likely as a result of DNA damage and defective nuclear envelope  
147 integrity, *DI* mutant testes rapidly degenerated (Figure 3 –figure supplement 1A, B). When *Omi*,  
148 a gene required to promote germ cell death (Yacobi-Sharon et al., 2013), was knocked down in  
149 *DI* mutant testes, it restored the cellularity in *DI* mutant testis (Figure 3-figure supplement 1C-  
150 D), but the surviving cells showed a dramatic increase in DNA damage (Figure 3-figure  
151 supplement 1E-F). Under these conditions, surviving germ cells in *DI* mutant testes showed high  
152 frequency of chromosome breaks compared to control (3.7% in control (n=27) vs. 15.8% in *DI*  
153 mutant (n=57)) (Figure 3G, H, arrowheads indicate sites of chromosome breaks). These results  
154 show that loss of *D1/HMGA1* results in compromised nuclear envelope integrity, leading to  
155 extensive DNA damage and chromosomal breaks.

156

### 157 **Micronuclei formation in *DI* mutant/*HMGA1* knockdown cells is due to budding from** 158 **nucleus during interphase.**

159 It has been shown that micronuclei form by lagging chromosomes (Crasta et al., 2012).  
160 Thus, we examined whether *DI* mutation/*HMGA1* knockdown resulted in mitotic chromosome  
161 segregation errors, causing micronuclei formation. However, we did not observe an increase in  
162 lagging chromosomes in *DI* mutant spermatogonia or *HMGA1*-depleted mouse cells (Figure 4 –  
163 figure supplement 1A-G), suggesting an alternative route for micronuclei formation. Instead,  
164 time-lapse live observation showed that micronuclei formed by budding off the interphase  
165 nucleus both in *Drosophila* spermatogonia and mouse cells (Figure 4A-D). In controls, nuclear  
166 contents (visualized by a GFP-tagged nuclear protein in *Drosophila* or the DNA dye, Hoechst, in

167 mouse cells) were maintained as a single and stable entity for a prolonged time period. In  
168 contrast, *D1* mutant and HMGA1-knockdown cells showed budding off of nuclear contents in  
169 interphase, leading to micronuclei formation. These results show that micronuclei in *D1*  
170 mutant/HMGA1-knockdown cells are generated during interphase, via budding from the nucleus.

171

## 172 **D1 bundles satellite DNA from multiple chromosomes to form chromocenter**

173 Based on the above results, we postulated that chromocenter formation, i.e. clustering of  
174 satellite DNA from multiple chromosomes, might be a mechanism to bundle heterologous  
175 chromosomes together to prevent individual chromosomes from floating out of nucleus. In this  
176 manner, the full set of chromosomes may be retained within a single nucleus. In the absence of  
177 chromocenter formation, individual chromosomes may bud off the nucleus, leading to  
178 micronuclei formation.

179

180 *in vitro* experiments indicated that HMGA1 is capable of crosslinking multiple DNA  
181 strands with individual AT-hooks binding AT-rich DNA strands (Vogel et al., 2011). Bundling  
182 of DNA in this manner by D1/HMGA1 could explain how pericentromeric satellite DNA from  
183 multiple chromosomes may be clustered to form chromocenters. A few lines of evidence support  
184 this idea. When *Drosophila* D1 was expressed in mouse cells, it localized to the chromocenter as  
185 described above (Figure 1G), and its overexpression enhanced chromocenter formation in a  
186 dose-dependent manner (Figure 5A-C): the higher amount D1 was expressed in mouse cells, the  
187 fewer chromocenters per cell was observed (i.e. more clustering). These results suggest that D1  
188 is sufficient to bundle its binding target, tethering it to chromocenter. Consistent with this idea,  
189 we found that artificial tethering of D1 protein to euchromatic LacO repeat DNA sequences was  
190 sufficient to bring LacO repeats to the chromocenter. D1 protein or D1-LacI fusion protein was  
191 expressed in a *Drosophila* strain in which LacO repeats are inserted in the distal regions of the  
192 2<sup>nd</sup> chromosome (Figure 5D, arrows). In control spermatogonial cells expressing wild type D1,  
193 LacO repeats were observed far away from the {AATAT}<sub>n</sub> satellite foci/chromocenters (Figure  
194 5E, G, arrow indicates site of LacO repeats in interphase nucleus). However, in cells expressing  
195 the LacI-D1 chimeric protein, we observed recruitment of the LacO repeats close to  
196 {AATAT}<sub>n</sub>/chromocenters (Figure 5F, G, arrow indicates site of LacO repeats recruited to the



197 chromocenter), demonstrating that D1's binding to a DNA sequence is sufficient to incorporate  
198 the target sequence into chromocenters.

199

200 Although it cannot be visualized how DNA strands from multiple chromosome might be  
201 bundled in these interphase chromocenters, deconvolution microscopy of D1/HMGA1 proteins  
202 on early mitotic chromosomes revealed proteinaceous threads between individual chromosomes  
203 (Figure 6A, B, arrows indicate D1/HMGA1 threads connecting mitotic chromosomes), which we  
204 speculate contribute to bundling of chromosomes in interphase. These threads were also  
205 detectable by DNA FISH against  $\{AATAT\}_n$  and major satellite (Figure 6C, D, dotted lines are  
206 alongside the satellite DNA threads), suggesting that satellite DNA bound by D1/HMGA1 can  
207 form threads that connect chromosomes. These D1/HMGA1 threads are reminiscent of 'DNA  
208 fibers', which were observed among mitotic chromosomes, although their function has never  
209 been appreciated (Burdick, 1976; Takayama, 1975; Kuznetsova et al., 2007).

210

211 Taken together, these results support a model, in which D1/HMGA1 bind their target  
212 sequences (satellite DNA) on multiple chromosomes and bundle them into chromocenters, likely  
213 via their multivalent DNA binding domains (multiple AT-hooks) (Figure 6E).

214

## 215 Discussion

216 The function of chromocenters, as well as that of satellite DNA, has remained enigmatic,  
217 even though cytological association of pericentromeric satellite DNA into chromocenters was  
218 identified almost 50 years ago (Pardue and Gall, 1970). Pericentromeric heterochromatin has  
219 most often been studied and discussed in the context of how to maintain its heterochromatic,  
220 repressed nature (Nishibuchi and Déjardin, 2017), based on the assumption that the underlying  
221 sequences are mostly selfish, which have negative phenotypic consequences when derepressed in  
222 cells (Zeller and Gasser, 2017).

223

224 Although satellite DNA's function has been speculated and implicated in several  
225 examples (Yunis and Yasmineh, 1971; Dernburg et al., 1996; Menon et al., 2014; Bonaccorsi et

226 al., 1990), the non-coding nature and lack of conservation in repeat sequence among closely  
227 related species led to the idea that they are mostly junk DNA, serving no essential function  
228 (Doolittle and Sapienza, 1980; Walker, 1971). Instead, we propose that satellite DNA is a critical  
229 constituent of eukaryotic chromosomes to ensure encapsulation of all chromosomes in interphase  
230 nucleus. Our results may also explain why the sequences of pericentromeric satellite DNA are so  
231 divergent among closely related species, a contributing factor that led to their dismissal as junk.  
232 Based on our model that pericentromeric satellite DNA serves as a platform for generating  
233 heterologous chromosome association to form chromocenters, the essential feature of satellite  
234 DNA is that they are bound by protein(s) capable of bundling multiple DNA strands. If so, the  
235 underlying sequence does not have to be conserved. Instead, the binding of satellite DNA by a  
236 chromocenter bundling protein may be a critical feature of pericentromeric satellite DNAs.  
237 Based on this idea, chromocenter bundling proteins and pericentromeric satellite DNA may be  
238 co-evolving.

239

240 In summary, our study provides the first evidence for a conserved function of  
241 pericentromeric satellite DNA and chromocenters. Our data suggest that the multi-AT hook  
242 proteins, D1 and HMGAI, play an evolutionarily conserved role in the formation of  
243 chromocenters, likely via their ability to bind and bundle satellite DNA from heterologous  
244 chromosomes. Heterologous chromosome association, mediated by chromocenter-binding  
245 proteins, may represent a third mode of chromosomal ‘gluing’ after meiotic homologous pairing  
246 and sister chromatid cohesion. Through heterologous association, the chromocenter plays a  
247 fundamental role in maintaining the full complement of the genome, which is divided into  
248 multiple chromosomes, into a single nucleus, thereby bringing about a signature characteristic of  
249 eukaryotic cells.

250

## 251 **Acknowledgments:**

252 We thank Cheng-Yu Lee, Scott Hawley, Stephen Weiss, Harry Mobley, Dave Bridges, Daniel  
253 Eitzman, Georg Krohne, Bloomington Drosophila Stock Center, Kyoto Stock Center,  
254 Developmental Studies Hybridoma Bank and Michigan Imaging Laboratory for reagents and  
255 resources. We thank the Yamashita lab members, Sue Hammoud, Ajit Joglekar, Puck Ohi, Dan

256 Barbash, and Maurizio Gatti for discussion and comments on the manuscript. This research was  
257 supported by the Howard Hughes Medical Institute (Y.Y) and an American Heart Association  
258 postdoctoral fellowship (M.J). MJ and YY conceived the project, interpreted the data and wrote  
259 the manuscript. All authors contributed to conducting experiments and analyzing data.

260

## 261 **Materials and Methods:**

262 **Fly husbandry and strains.** All fly stocks were raised on standard Bloomington medium at  
263 25°C. The following fly stocks were used: *DI<sup>EY05004</sup>*(BDSC17340), *Df(3R)BSC666*  
264 (BDSC26518), *UAS-Omi<sup>RNAi</sup>* (BDSC55165), *UAS-GFP-nls* (BDSC4776) and *UAS-GFP-ER-SR*  
265 (BDSC59042) were obtained from the Bloomington *Drosophila* stock center. *DI<sup>LL03310</sup>*  
266 (DGRC140754) and *Df31-GFP* (DGRC110806) were obtained from the Kyoto stock center. *nos-*  
267 *gal4*(Van Doren et al., 1998), *hs-flp;nos-FRT-stop-FRT-gal4,UAS-GFP* (Salzmann et al., 2013),  
268 *UAS-H2A-YFP* (Bellaïche et al., 2001) and *BI LacO* (Vazquez et al., 2002) have been  
269 previously described. A stock containing B chromosomes, *mtrm<sup>126</sup>+B* (Bauerly et al., 2014), was  
270 a kind gift from Scott Hawley. Chromocenter disruption was scored in *Drosophila* testes by  
271 assessing {AATAT}<sub>n</sub> morphology in GFP+ cells that were generated as follows in control (*hs-*  
272 *flp; nos-FRT-stop-FRT-gal4,UAS-GFP*) and *DI* mutant (*hs-flp;nos-FRT-stop-FRT-gal4, UAS-*  
273 *GFP;DI<sup>LL03310</sup>/Df*) flies. Testes were dissected 24h following a 20 minute heat shock at 37°C.  
274 Micronuclei were scored in 0-3d testes where early germ cell chromosomes were labeled with  
275 H2A-YFP. The genotypes used were, control – *nos>H2A-YFP* and *DI* mutant – *nos>H2A-YFP;*  
276 *DILL03310/Df*.

277

278 **Transgene construction.** For construction of *UAS-GFP-DI*, the *DI* ORF was PCR-amplified  
279 from cDNA using the following primer pair, 5'-  
280 GATCAGATCTATGGAGGAAGTTGCGGTAAAG-3' and 5'-  
281 GATCCTCGAGTTAGGCAGCTACCGATTCGG-3'. The amplified fragment was subcloned  
282 into the *Bgl*II and *Xho*I sites of *pUAS<sup>+</sup>-EGFP-attB*(Salzmann et al., 2013) resulting in *UAS-*  
283 *GFP-DI*. For *UAS-GFP-LacI-DI*, the *LacI* ORF (lacking 11 C-terminal residues) (Straight et al.,  
284 1996) was synthesized using GeneArt (Thermofisher) and inserted into the *Bgl*II site of *UAS-*  
285 *GFP-DI* resulting in *UAS-GFP-LacI-DI*. Transgenic flies were generated by PhiC31 integrase-

286 mediated transgenesis into the *attP40* site (BestGene). For expression of GFP and GFP-D1 in  
287 mouse cells, *GFP* and *GFP-D1* was subcloned from *pUASSt-EGFP-attB* into pCDNA3 (gift from  
288 Cheng-Yu Lee) using EcoRI and XhoI sites.

289

290 **Cell lines.** MOVAS cells were obtained from Daniel Eitzman. C2C12 cells were obtained from  
291 David Bridges. RAW264.7 cells were obtained from Dr. Harry Mobley. C3H10T1/2 cells were  
292 obtained from Stephen Weiss. MOVAS, C2C12 and RAW264.7 cells were maintained in  
293 Dulbecco's minimal essential medium (DMEM) (Gibco) supplemented with 10% fetal bovine  
294 serum (FBS). C3H10T1/2 cell line was maintained in alpha minimal essential media (Gibco)  
295 supplemented with 10% fetal bovine serum.

296

297 **siRNA and Transfections.** RNA interference (RNAi) against HMGA1 was performed using  
298 ON-TARGET plus Mouse HMGA1 siRNA SMARTpool (Dharmacon, L-049293-01) consisting  
299 of the following target sequences, CCAUUUAGCCGCAGCCCGA,  
300 AGGCAAACGGGCACCAACA, GGGCGCAGCAGACUGGUUA,  
301 GUUCAUUCUUAGAUACCCA. ON-TARGET plus Non-targeting pool (Dharmacon, D-  
302 001810-10) consisting of the following sequences, UGGUUUACAUGUCGACUAA,  
303 UGGUUUACAUGUUGUGUGA, UGGUUUACAUGUUUUCUGA,  
304 UGGUUUACAUGUUUUCUA, was used as a negative control. siRNA transfections were  
305 performed using DharmaFECT 4 reagent (Dharmacon) according to the manufacturer's protocol.  
306 25nM of siControl and siHMGA1 were transfected using DharmaFECT 4 (Dharmacon)  
307 according to the manufacturer's protocol. Cells were fixed for immunostaining/*in situ*  
308 hybridization 6 days post transfection. Transient transfection of GFP and GFP-D1 was  
309 performed using Fugene HD (Roche) reagent according to the manufacturer's protocol.

310

311 **Immunofluorescence staining and microscopy.** For *Drosophila* tissues, immunofluorescence  
312 staining was performed as described previously(Cheng et al., 2008). Briefly, tissues were  
313 dissected in PBS, transferred to 4% formaldehyde in PBS and fixed for 30 minutes. Testes were  
314 then washed in PBS-T (PBS containing 0.1% Triton-X) for at least 60 minutes, followed by

315 incubation with primary antibody in 3% bovine serum albumin (BSA) in PBS-T at 4°C  
316 overnight. Samples were washed for 60 minutes (three 20-minute washes) in PBS-T, incubated  
317 with secondary antibody in 3% BSA in PBS-T at 4°C overnight, washed as above, and mounted  
318 in VECTASHIELD with DAPI (Vector Labs). The following primary antibodies were used:  
319 rabbit anti-vasa (1:200; d-26; Santa Cruz Biotechnology), rabbit anti-H3K9 dimethyl (1:200;  
320 Abcam, ab32521), guinea pig anti-Otefin (gift from Georg Krohne, 1:400), chicken anti-Cid  
321 (1:500, generated using the synthetic peptide CDGENDANDGYVSDNYNDSSESVAA  
322 (Covance)), mouse anti-LaminDm<sub>0</sub> (ADL84.12, 1:200, Developmental Studies Hybridoma  
323 Bank), mouse anti- $\gamma$ -H2Av (UNC93-5.2.1, 1:400, Developmental Studies Hybridoma Bank),  
324 Phalloidin-Alexa546 (ThermoFisher, a22283, 1:200). Adherent mouse cells were fixed in 4%  
325 formaldehyde in PBS for 20 minutes at room temperature on coverslips. Cells were  
326 permeabilized in PBS-T for 5 minutes, rinsed 3 times with PBS, blocked using 3% BSA in PBS-  
327 T for 30 minutes at room temperature and incubated with primary antibody diluted in 3% BSA in  
328 PBS-T overnight at 4°C. Cells were then washed for 30 minutes (three 10-minute washes),  
329 incubated with secondary antibody in 3% BSA in PBS-T for 2 hours at room temperature,  
330 washed as above and mounted in VECTASHIELD with DAPI (Vector Labs). For nucleosolic  
331 extraction, cells were incubated with CSK buffer (10mM PIPES pH7, 100mM NaCl, 300mM  
332 sucrose, 3mM MgCl<sub>2</sub>, 0.5% Triton X-100, 1mM PMSF) for 10 minutes at room temperature.  
333 After CSK extraction, cells were washed with PBS and fixed and immunostained as above. The  
334 following antibodies were used: rabbit anti-HMGA1 (1:400, Abcam, ab129153), goat anti-  
335 LaminB (C-20) (1:20, Santa Cruz Biotechnology, sc-2616), mouse anti- $\alpha$ -tubulin (4.3, 1:100,  
336 Developmental Studies Hybridoma Bank) and  $\gamma$ -H2Ax S139 (2577, 1:200, Cell Signaling  
337 Technologies). Images were taken using a Leica TCS SP8 confocal microscope with 63x oil-  
338 immersion objectives (NA=1.4). Deconvolution was performed when indicated using the  
339 Hyvolution package from Leica. Images were processed using Adobe Photoshop software.

340

341 **Time-lapse live imaging.** Testes from newly eclosed flies were dissected into  
342 Schneider's *Drosophila* medium containing 10% fetal bovine serum. The testis tips were placed  
343 inside a sterile glass-bottom chamber and were mounted on a three-axis computer-controlled  
344 piezoelectric stage. An inverted Leica TCS SP8 confocal microscope with a 63 $\times$  oil immersion

345 objective (NA = 1.4) was used for imaging. For mouse live cell imaging, transfected cells were  
346 seeded onto a sterile glass-bottom chamber coated with poly-lysine. Cells were incubated with  
347 Hoechst 33342 for 10 minutes, rinsed with PBS and fresh medium was added to the chamber.  
348 Cells were imaged using a stage-top Tokai-Hit incubator that was mounted on an inverted TCS  
349 SP5 confocal microscope with a 63x oil immersion objective (NA = 1.4). All images were  
350 processed using Adobe Photoshop software.

351

352 **DNA fluorescence *in situ* hybridization.** Whole mount *Drosophila* testes were prepared as  
353 described above, and optional immunofluorescence staining protocol was carried out first.  
354 Subsequently, samples were post-fixed with 4% formaldehyde for 10 minutes and washed in  
355 PBS-T for 30 minutes. Fixed samples were incubated with 2 mg/ml RNase A solution at 37°C  
356 for 10 minutes, then washed with PBS-T + 1mM EDTA. Samples were washed in 2xSSC-T  
357 (2xSSC containing 0.1% Tween-20) with increasing formamide concentrations (20%, 40% and  
358 50%) for 15 minutes each followed by a final 30-minute wash in 50% formamide. Hybridization  
359 buffer (50% formamide, 10% dextran sulfate, 2x SSC, 1mM EDTA, 1 µM probe) was added to  
360 washed samples. Samples were denatured at 91°C for 2 minutes, then incubated overnight at  
361 37°C. For mitotic chromosome spreads, testes and larval 3<sup>rd</sup> instar brains were squashed  
362 according to previously described methods (Larracunte and Ferree, 2015). Briefly, tissue was  
363 dissected into 0.5% sodium citrate for 5-10 minutes and fixed in 45% acetic acid/2.2%  
364 formaldehyde for 4-5 minutes. Fixed tissues were firmly squashed with a cover slip and slides  
365 were submerged in liquid nitrogen until bubbling ceased. Coverslips were then removed with a  
366 razor blade and slides were dehydrated in 100% ethanol for at least 5 minutes. After drying,  
367 hybridization mix (50% formamide, 2x SSC, 10% dextran sulfate, 100 ng of each probe) was  
368 applied directly to the slide, samples were heat denatured at 95°C for 5 minutes and allowed to  
369 hybridize overnight at room temperature. Following hybridization, slides were washed 3 times  
370 for 15 minutes in 0.2X SSC and mounted with VECTASHIELD with DAPI (Vector Labs). For  
371 the *in situ* experiment described in Figure 4j-m, testes were dissected into PBS and fixed in 4%  
372 formaldehyde for 4 minutes. Tips of fixed testes were firmly squashed with a cover slip and  
373 slides were submerged in liquid nitrogen until bubbling ceased. Coverslips were removed with a  
374 razor blade and slides were subjected to 5-minute washes in 2XSSC and 2XSSC with 0.1%  
375 Tween-20. The samples were denatured in freshly made 0.07N NaOH for 5 minutes, rinsed in

376 2X SSC. Hybridization mix (50% formamide, 2x SSC, 10% dextran sulfate, 100 ng of each  
377 probe) was added directly to the slide and allowed to hybridize overnight at room temperature.  
378 Following hybridization, slides were washed 3 times for 15 minutes in 0.2X SSC and mounted  
379 with VECTASHIELD with DAPI (Vector Labs). The following probes were used for *Drosophila*  
380 in situ hybridization: {AATAT}<sub>6</sub>, {AAGAG}<sub>6</sub>, IGS and have been previously described. LacO  
381 probe - 5'-Cy5-CCACAAATTGTTATCCGCTCACAATTCCAC-3'. For interphase mouse  
382 cells, optional immunostaining was carried out as above. Subsequently, samples were post-fixed  
383 with 4% formaldehyde in PBS for 10 minutes and rinsed three times in PBS. Post-fixed cells  
384 were incubated with 0.1 mg/ml RNase A solution at 37°C for 1 hour, rinsed three times in PBS  
385 and denatured in 1.9M HCl for 30 minutes. After three rinses in ice-cold PBS, hybridization mix  
386 (2X SSC, 60% formamide, 5µg/ml salmon sperm DNA and 500nM probe) was added to the  
387 samples and incubated overnight at room temperature. Following hybridization, coverslips were  
388 washed 3 times for 15 minutes in 2X SSC and mounted with VECTASHIELD with DAPI  
389 (Vector Labs). For mouse mitotic cells, chromosomes were spread on slides as previously  
390 described. Subsequently, chromosomes were denatured in 70% formamide in 2XSSC for 1.5  
391 minutes at 70°C, dehydrated in 100% ethanol and hybridization mix (2X SSC, 60% formamide,  
392 5µg/ml salmon sperm DNA and 500nM probe) was added directly to the slide and incubated  
393 overnight at room temperature. Following hybridization, slides were washed 3 times for 15  
394 minutes in 2X SSC and mounted with VECTASHIELD with DAPI (Vector Labs). The following  
395 probe was used: Major satellite - 5'-Cy3-GGAAAATTTAGAAATGTCCACTG-3'.

396

397

398 **References:**

- 399 Barton, L.J., S.R. Wilmington, M.J. Martin, H.M. Skopec, K.E. Lovander, B.S. Pinto, and P.K.  
400 Geyer. 2014. Unique and Shared Functions of Nuclear Lamina LEM Domain Proteins in  
401 *Drosophila*. *Genetics*. 197:653–665. doi:10.1534/genetics.114.162941.
- 402 Bauerly, E., S.E. Hughes, D.R. Vietti, D.E. Miller, W. McDowell, and R.S. Hawley. 2014.  
403 Discovery of supernumerary B chromosomes in *Drosophila melanogaster*. *Genetics*.  
404 196:1007–16. doi:10.1534/genetics.113.160556.
- 405 Bellaïche, Y., M. Gho, J.A. Kaltschmidt, A.H. Brand, and F. Schweisguth. 2001. Frizzled  
406 regulates localization of cell-fate determinants and mitotic spindle rotation during  
407 asymmetric cell division. *Nat. Cell Biol.* 3:50–7. doi:10.1038/35050558.
- 408 Bonaccorsi, S., M. Gatti, C. Pisano, and A. Lohe. 1990. Transcription of a satellite DNA on two  
409 Y chromosome loops of *Drosophila melanogaster*. *Chromosoma*. 99:260–6.  
410 doi:10.1007/BF01731701.
- 411 Bulut-Karslioglu, A., V. Perrera, M. Scaranaro, I.A. de la Rosa-Velazquez, S. van de Nobelen,  
412 N. Shukeir, J. Popow, B. Gerle, S. Opravil, M. Pagani, S. Meidhof, T. Brabletz, T.  
413 Manke, M. Lachner, and T. Jenuwein. 2012. A transcription factor-based mechanism for  
414 mouse heterochromatin formation. *Nat. Struct. Mol. Biol.* 19:1023–30.  
415 doi:10.1038/nsmb.2382.
- 416 Burdick, A.B. 1976. Somatic cell chromosome interconnections in trypan preparations of  
417 Chinese hamster testicular cells. *Exp. Cell Res.* 99:425–8.
- 418 Cheng, J., N. Türkel, N. Hemati, M.T. Fuller, A.J. Hunt, and Y.M. Yamashita. 2008. Centrosome  
419 misorientation reduces stem cell division during ageing. *Nature*. 456:599–604.  
420 doi:10.1038/nature07386.
- 421 Crasta, K., N.J. Ganem, R. Dagher, A.B. Lantermann, E.V. Ivanova, Y. Pan, L. Nezi, A.  
422 Protopopov, D. Chowdhury, and D. Pellman. 2012. DNA breaks and chromosome  
423 pulverization from errors in mitosis. *Nature*. 482:53–8. doi:10.1038/nature10802.
- 424 Denais, C.M., R.M. Gilbert, P. Isermann, A.L. McGregor, M. te Lindert, B. Weigelin, P.M.  
425 Davidson, P. Friedl, K. Wolf, and J. Lammerding. 2016. Nuclear envelope rupture and  
426 repair during cancer cell migration. *Science*. 352:353–8. doi:10.1126/science.aad7297.
- 427 Dernburg, A.F., J.W. Sedat, and R.S. Hawley. 1996. Direct evidence of a role for  
428 heterochromatin in meiotic chromosome segregation. *Cell*. 86:135–46.



- 429 Doolittle, W.F., and C. Sapienza. 1980. Selfish genes, the phenotype paradigm and genome  
430 evolution. *Nature*. 284:601–3.
- 431 Doren, M. Van, A.L. Williamson, and R. Lehmann. 1998. Regulation of zygotic gene expression  
432 in *Drosophila* primordial germ cells. *Curr. Biol.* 8:243–6.
- 433 Dorn, G.W., C.F. Clark, W.H. Eschenbacher, M.-Y.Y. Kang, J.T. Engelhard, S.J. Warner, S.J.  
434 Matkovich, and C.C. Jowdy. 2011. MARF and Opa1 control mitochondrial and cardiac  
435 function in *Drosophila*. *Circ. Res.* 108:12–7. doi:10.1161/CIRCRESAHA.110.236745.
- 436 Fransz, P., J.H. De Jong, M. Lysak, M.R. Castiglione, and I. Schubert. 2002. Interphase  
437 chromosomes in *Arabidopsis* are organized as well defined chromocenters from which  
438 euchromatin loops emanate. *Proc. Natl. Acad. Sci. U.S.A.* 99:14584–9.  
439 doi:10.1073/pnas.212325299.
- 440 Goodwin, G.H., C. Sanders, and E.W. Johns. 1973. A new group of chromatin-associated  
441 proteins with a high content of acidic and basic amino acids. *Eur. J. Biochem.* 38:14–9.
- 442 Guenatri, M., D. Bailly, C. Maison, and G. Almouzni. 2004. Mouse centric and pericentric  
443 satellite repeats form distinct functional heterochromatin. *J. Cell Biol.* 166:493–505.  
444 doi:10.1083/jcb.200403109.
- 445 Hahn, M., S. Dambacher, S. Dulev, A. Kuznetsova, S. Eck, S. Worz, D. Sadic, M. Schulte, J.  
446 Mallm, A. Maiser, P. Debs, H. Melchner, H. Leonhardt, L. Schermelleh, K. Rohr, K.  
447 Rippe, Z. Storchova, and G. Schotta. 2013. Suv4-20h2 mediates chromatin compaction  
448 and is important for cohesin recruitment to heterochromatin. *Genes & Development.*  
449 27:859872. doi:10.1101/gad.210377.112.
- 450 Hatch, E.M., A.H. Fischer, T.J. Deerinck, and M.W. Hetzer. 2013. Catastrophic nuclear envelope  
451 collapse in cancer cell micronuclei. *Cell.* 154:47–60. doi:10.1016/j.cell.2013.06.007.
- 452 Hatch, E.M., and M.W. Hetzer. 2015. Chromothripsis. *Curr. Biol.* 25:R397–9.  
453 doi:10.1016/j.cub.2015.02.033.
- 454 Jagannathan, M., N. Warsinger-Pepe, G.J. Watase, and Y.M. Yamashita. 2017. Comparative  
455 Analysis of Satellite DNA in the *Drosophila melanogaster* Species Complex. *G3*  
456 (*Bethesda*). 7:693–704. doi:10.1534/g3.116.035352.
- 457 Kuznetsova, I.S., N.I. Erukashvily, E.M. Noniashvili, A.N. Shatrova, N.D. Aksenov, V.V.  
458 Zenin, A.P. Dyban, and O.I. Podgornaya. 2007. Evidence for the existence of satellite  
459 DNA-containing connection between metaphase chromosomes. *J. Cell. Biochem.*

- 460 101:1046–61. doi:10.1002/jcb.21237.
- 461 Levinger, L., and A. Varshavsky. 1982a. Selective arrangement of ubiquitinated and D1 protein-  
462 containing nucleosomes within the *Drosophila* genome. *Cell*. 28:375–85.
- 463 Levinger, L., and A. Varshavsky. 1982b. Protein D1 preferentially binds A + T-rich DNA in  
464 vitro and is a component of *Drosophila melanogaster* nucleosomes containing A + T-rich  
465 satellite DNA. *Proc. Natl. Acad. Sci. U.S.A.* 79:7152–6.
- 466 Lund, T., J. Holtlund, M. Fredriksen, and S.G. Laland. 1983. On the presence of two new high  
467 mobility group-like proteins in HeLa S3 cells. *FEBS Lett.* 152:163–7.
- 468 Lyon, MF, and AG Searle. 1989. Genetic variants and strains of the laboratory mouse.
- 469 Menon, D.U., C. Coarfa, W. Xiao, P.H. Gunaratne, and V.H. Meller. 2014. siRNAs from an X-  
470 linked satellite repeat promote X-chromosome recognition in *Drosophila melanogaster*.  
471 *Proc. Natl. Acad. Sci. U.S.A.* 111:16460–5. doi:10.1073/pnas.1410534111.
- 472 Nishibuchi, G., and J. Déjardin. 2017. The molecular basis of the organization of repetitive  
473 DNA-containing constitutive heterochromatin in mammals. *Chromosome Res.* 25:77–87.  
474 doi:10.1007/s10577-016-9547-3.
- 475 Pardue, M.L., and J.G. Gall. 1970. Chromosomal localization of mouse satellite DNA. *Science*.  
476 168:1356–8.
- 477 Peters, A.H., D. O’Carroll, H. Scherthan, K. Mechtler, S. Sauer, C. Schöfer, K.  
478 Weipoltshammer, M. Pagani, M. Lachner, A. Kohlmaier, S. Opravil, M. Doyle, M.  
479 Sibilica, and T. Jenuwein. 2001. Loss of the Suv39h histone methyltransferases impairs  
480 mammalian heterochromatin and genome stability. *Cell*. 107:323–37.
- 481 Pinheiro, I., R. Margueron, N. Shukeir, M. Eisold, C. Fritsch, F.M. Richter, G. Mittler, C.  
482 Genoud, S. Goyama, M. Kurokawa, J. Son, D. Reinberg, M. Lachner, and T. Jenuwein.  
483 2012. Prdm3 and Prdm16 are H3K9me1 methyltransferases required for mammalian  
484 heterochromatin integrity. *Cell*. 150:948–60. doi:10.1016/j.cell.2012.06.048.
- 485 Probst, A.V., I. Okamoto, M. Casanova, F. El Marjou, P. Le Baccon, and G. Almouzni. 2010. A  
486 strand-specific burst in transcription of pericentric satellites is required for chromocenter  
487 formation and early mouse development. *Dev. Cell*. 19:625–38.  
488 doi:10.1016/j.devcel.2010.09.002.
- 489 Raab, M., M. Gentili, H. de Belly, H.R. Thiam, P. Vargas, A.J. Jimenez, F. Lautenschlaeger, R.  
490 Voituriez, A.M. Lennon-Duménil, N. Manel, and M. Piel. 2016. ESCRT III repairs

- 491 nuclear envelope ruptures during cell migration to limit DNA damage and cell death.  
492 *Science*. 352:359–62. doi:10.1126/science.aad7611.
- 493 Radic, M.Z., M. Saghbini, T.S. Elton, R. Reeves, and B.A. Hamkalo. 1992. Hoechst 33258,  
494 distamycin A, and high mobility group protein I (HMG-I) compete for binding to mouse  
495 satellite DNA. *Chromosoma*. 101:602–8.
- 496 Rodriguez Alfageme, C., G.T. Rudkin, and L.H. Cohen. 1980. Isolation, properties and cellular  
497 distribution of D1, a chromosomal protein of *Drosophila*. *Chromosoma*. 78:1–31.
- 498 Salzmann, V., M. Inaba, J. Cheng, and Y.M. Yamashita. 2013. Lineage tracing quantification  
499 reveals symmetric stem cell division in *Drosophila* male germline stem cells. *Cell Mol*  
500 *Bioeng*. 6:441–448. doi:10.1007/s12195-013-0295-6.
- 501 Straight, A.F., A.S. Belmont, C.C. Robinett, and A.W. Murray. 1996. GFP tagging of budding  
502 yeast chromosomes reveals that protein-protein interactions can mediate sister chromatid  
503 cohesion. *Curr. Biol*. 6:1599–608.
- 504 Strauss, F., and A. Varshavsky. 1984. A protein binds to a satellite DNA repeat at three specific  
505 sites that would be brought into mutual proximity by DNA folding in the nucleosome.  
506 *Cell*. 37:889–901.
- 507 Sun, X., H.D. Le, J.M. Wahlstrom, and G.H. Karpen. 2003. Sequence analysis of a functional  
508 *Drosophila* centromere. *Genome Res*. 13:182–94. doi:10.1101/gr.681703.
- 509 Sun, X., J. Wahlstrom, and G. Karpen. 1997. Molecular structure of a functional *Drosophila*  
510 centromere. *Cell*. 91:1007–19.
- 511 Takayama, S. 1975. Interchromosomal connectives in squash preparations of L cells. *Exp. Cell*  
512 *Res*. 91:408–12.
- 513 Vazquez, J., A.S. Belmont, and J.W. Sedat. 2002. The dynamics of homologous chromosome  
514 pairing during male *Drosophila* meiosis. *Curr. Biol*. 12:1473–83.
- 515 Vogel, B., A. Löscherger, M. Sauer, and R. Hock. 2011. Cross-linking of DNA through  
516 HMGA1 suggests a DNA scaffold. *Nucleic Acids Res*. 39:7124–33.  
517 doi:10.1093/nar/gkr396.
- 518 Walker, P.M. 1971. Origin of satellite DNA. *Nature*. 229:306–8.
- 519 Willard, H.F. 1990. Centromeres of mammalian chromosomes. *Trends Genet*. 6:410–6.
- 520 Yacobi-Sharon, K., Y. Namdar, and E. Arama. 2013. Alternative germ cell death pathway in  
521 *Drosophila* involves HtrA2/Omi, lysosomes, and a caspase-9 counterpart. *Dev. Cell*.

- 522 25:29–42. doi:10.1016/j.devcel.2013.02.002.
- 523 Yunis, J.J., and W.G. Yasmineh. 1971. Heterochromatin, satellite DNA, and cell function.  
524 Structural DNA of eucaryotes may support and protect genes and aid in speciation.  
525 *Science*. 174:1200–9. doi:10.1126/science.174.4015.1200.
- 526 Zeller, P., and S.M. Gasser. 2017. The Importance of Satellite Sequence Repression for Genome  
527 Stability. *Cold Spring Harb. Symp. Quant. Biol.* doi:10.1101/sqb.2017.82.033662.
- 528 Zeller, P., J. Padeken, R. van Schendel, V. Kalck, M. Tijsterman, and S.M. Gasser. 2016.  
529 Histone H3K9 methylation is dispensable for *Caenorhabditis elegans* development but  
530 suppresses RNA:DNA hybrid-associated repeat instability. *Nat. Genet.* 48:1385–1395.  
531 doi:10.1038/ng.3672.
- 532 Zhang, C.-Z.Z., A. Spektor, H. Cornils, J.M. Francis, E.K. Jackson, S. Liu, M. Meyerson, and D.  
533 Pellman. 2015. Chromothripsis from DNA damage in micronuclei. *Nature*. 522:179–84.  
534 doi:10.1038/nature14493.
- 535 Zhu, Q., G.M. Pao, A.M. Huynh, H. Suh, N. Tonnu, P.M. Nederlof, F.H. Gage, and I.M. Verma.  
536 2011. BRCA1 tumour suppression occurs via heterochromatin-mediated silencing.  
537 *Nature*. 477:179–84. doi:10.1038/nature10371.
- 538
- 539

540 **Figures**

**Figure 1**

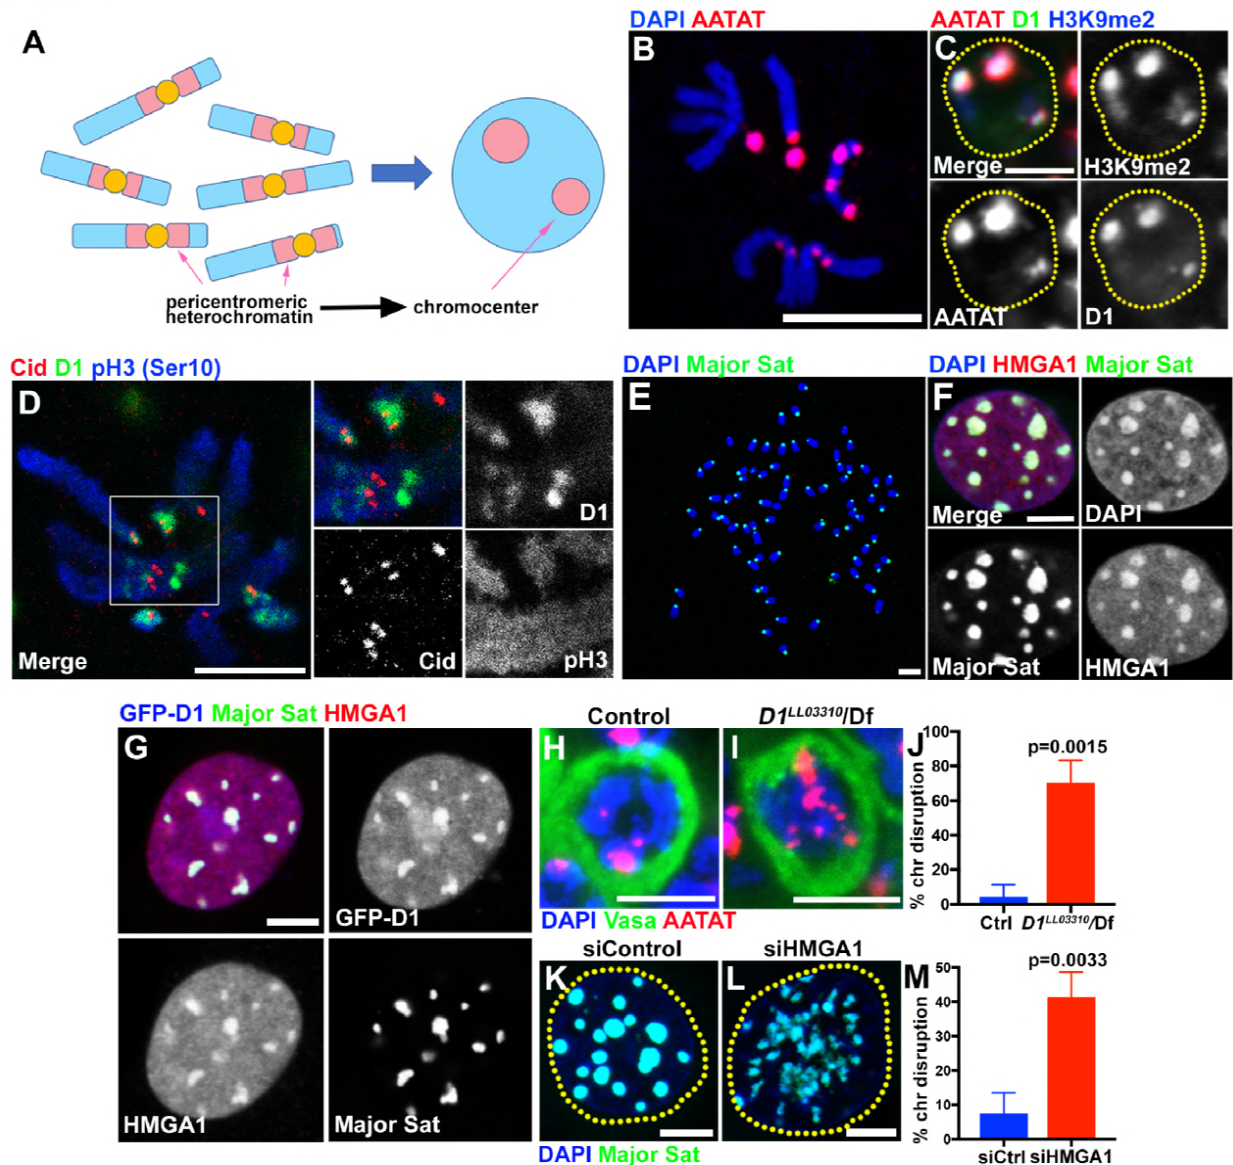

541  
542 **Figure 1. Multi-AT-hook proteins, D1 and HMGA1, are required for chromocenter**  
543 **formation in *Drosophila* and mouse cells.**

544 (A) Schematic of pericentromeric heterochromatin being organized into chromocenter. (B) FISH  
545 against {AATAT}<sub>n</sub> satellite (red) on the *Drosophila* neuroblast mitotic chromosomes co-stained  
546 with DAPI (blue) indicating the location of {AATAT}<sub>n</sub> in the *Drosophila* genome. (C) FISH  
547 against {AATAT}<sub>n</sub> satellite (red) in spermatogonial cells immunostained for H3K9me2 (blue)  
548 and D1 (green). Dotted lines indicate nucleus. Bars: 5µm. (D) *Drosophila* neuroblast mitotic

549 chromosomes stained for D1 (green), phospho-histone H3 Serine 10 (pH3-S10) (blue) and  
550 Cid/CENP-A (red). (E-G) FISH against the mouse major satellite (green) on C2C12 mitotic  
551 chromosomes co-stained with DAPI (blue) (E), in interphase MOVAS cells co-stained for DAPI  
552 (blue) and HMGA1 (red) (F) and in MOVAS cells expressing GFP-D1 (green) stained for  
553 HMGA1 (red) (G). (H, I) FISH against {AATAT}<sub>n</sub> satellite (red) in control (*DI<sup>LL03310</sup>/+*) (H) and  
554 *DI<sup>LL03310</sup>/Df* (I) spermatogonial cells stained for DAPI (blue) and Vasa (green). (J)  
555 Quantification of spermatogonial cells with disrupted chromocenters (+/+ control n=117,  
556 *DI<sup>LL03310</sup>/Df* n=89) from three independent experiments. P value from student's t-test is shown.  
557 Error bars: SD. (K, L) FISH against the major satellite (green) in siControl (K) and siHMGA1  
558 (L) transfected MOVAS cells co-stained with DAPI (blue). (M) Quantification of cells with  
559 disrupted chromocenters from siControl (n=304) and siHMGA1 (n=329) from three independent  
560 experiments.  
561

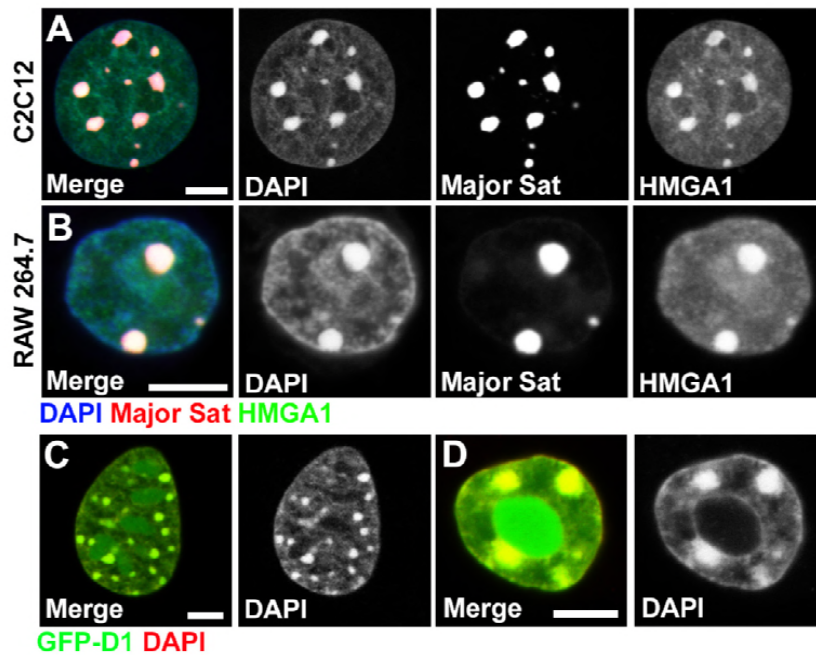

562

563 **Figure 1- figure supplement 1. AT-hook containing proteins, *Drosophila* D1 and mouse**

564 **HMGA1, localize to chromocenters in various mouse cell types.**

565 (A, B) FISH against the mouse major satellite (red) in C2C12 (A) and RAW 264.7 (B) cells

566 stained for HMGA1 (green) and DAPI (blue). (C, D) Colocalization of GFP-D1 (green) with

567 DAPI-dense chromocenters in C2C12 (C) and RAW 264.7(D) cells. DAPI (red). Scale bars:

568 5 $\mu$ m.

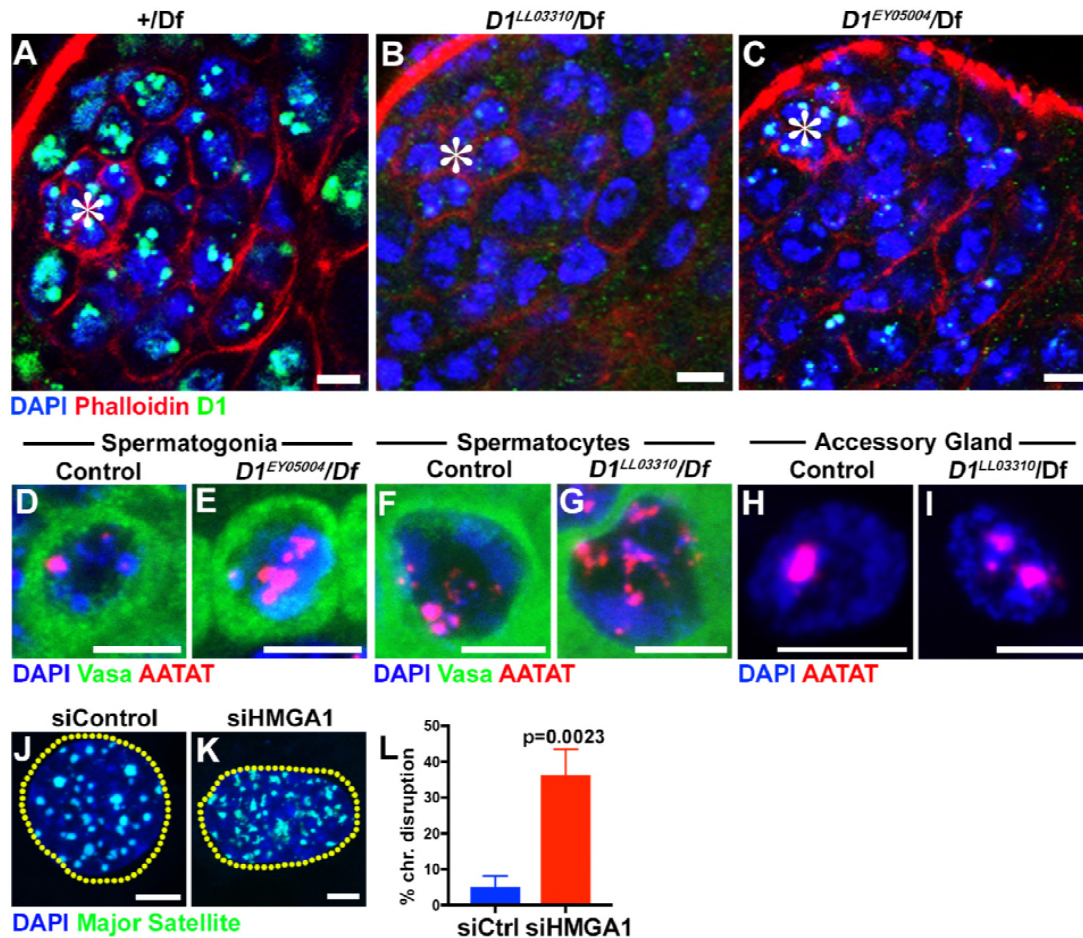

569

570 **Figure 1- figure supplement 2. *Drosophila* D1 and mouse HMGA1 are required for**  
 571 **chromocenter formation.**

572 (A-C) Testes from control (+/Df) (A) and two *D1* mutant (*D1<sup>LL03310</sup>/Df*(B) and *D1<sup>EY05004</sup>/Df*(C))

573 flies were stained for DAPI (blue), Phalloidin (red) and D1 (green). Asterisks indicate the apical

574 tip of the testis. Bars: 5µm. (D, E) FISH against {AATAT}<sub>n</sub> (red) in control (*D1<sup>EY05004</sup>/+*) (D)

575 and *D1<sup>EY05004</sup>/Df* (E) spermatogonial cells stained for DAPI (blue) and Vasa (green). Bars:

576 2.5µm. (F, G) FISH against {AATAT}<sub>n</sub> (red) in control (*D1<sup>LL03310</sup>/+*) (F) and *D1<sup>LL03310</sup>/Df* (G)

577 spermatocytes stained for DAPI (blue) and Vasa (green). (H, I) FISH against {AATAT}<sub>n</sub> (red) in

578 control (*D1<sup>LL03310</sup>/+*) (H) and *D1<sup>LL03310</sup>/Df* (I) accessory gland cells stained for DAPI (blue). Bars:

579 5µm. (J, K) FISH against the major satellite (green) in siControl (J) and siHMGA1 transfected

580 (K) C2C12 cells. Dotted lines indicate nucleus. (L) Quantification of cells with disrupted

581 chromocenters in siControl (n=304) and siHMGA1 (n=298) transfected C2C12 cells from three

582 independent experiments. P value from student's t-test is shown. Error bars: SD.



**Figure 2**

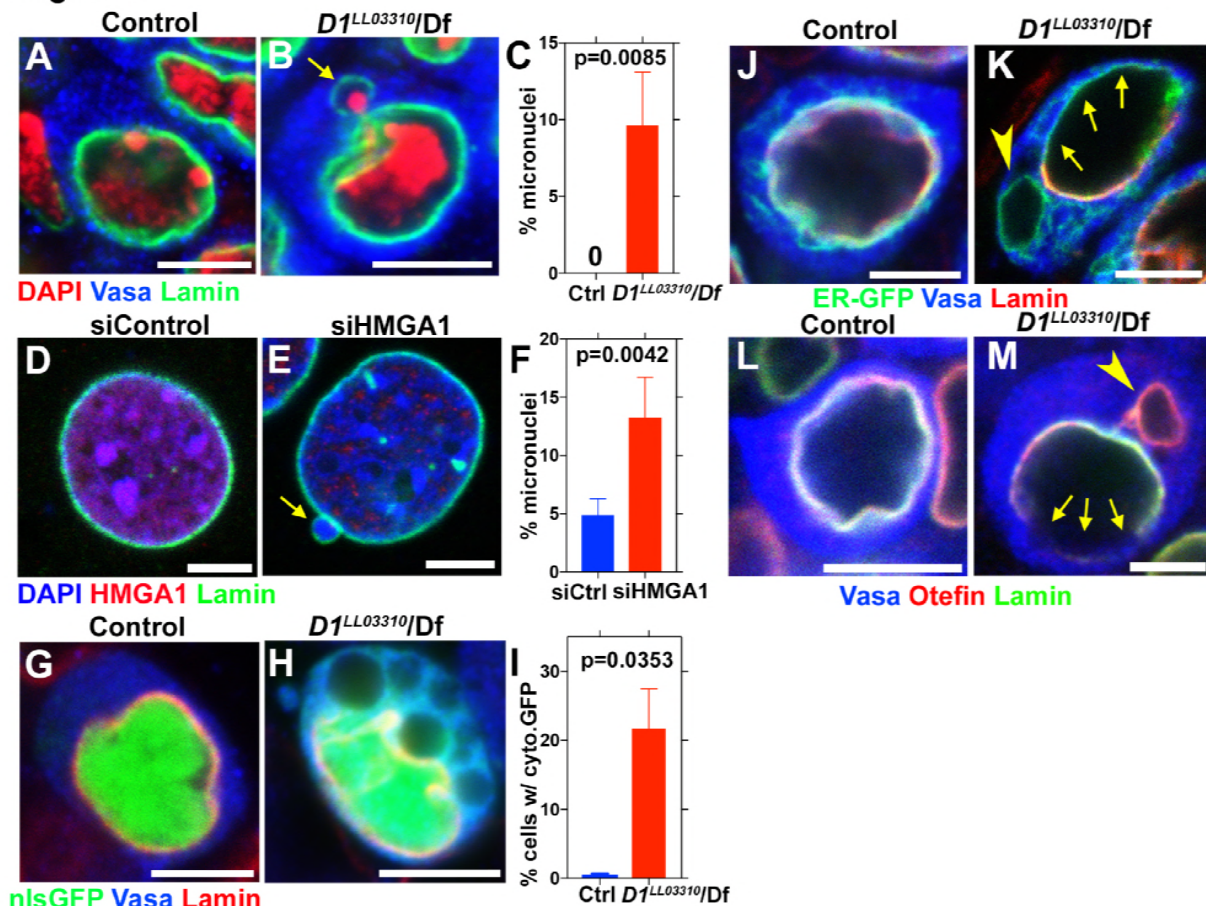

583

584 **Figure 2. D1/HMGA1 loss of function results in micronuclei formation, and defective**  
 585 **nuclear envelope integrity.**

586 (A, B) Control ( $D1^{LL03310/+}$ ) (A) and  $D1^{LL03310}/Df$  mutant (B) spermatogonial cells stained for  
 587 DAPI (red), Vasa (blue) and LaminDm<sub>0</sub> (green). Arrow indicates micronucleus. Bars: 5 $\mu$ m. (C)  
 588 Quantification of micronuclei containing cells from +/+ control (n=269) and  $D1^{LL03310}/Df$   
 589 (n=334) from three independent experiments. P value from student's t-test is shown. Error bars:  
 590 SD. (D, E) siControl (D) and siHMGA1 transfected (E) MOVAS cells stained for DAPI (blue),  
 591 HMGA1 (red) and Lamin (green). Arrow indicates micronucleus. (F) Quantification of  
 592 micronuclei containing cells in siControl (n=518) and siHMGA1 (n=588) transfected cells from  
 593 four independent experiments. (G, H) Control ( $D1^{LL03310/+}$ ) (G) and  $D1^{LL03310}/Df$  (H)  
 594 spermatogonia expressing nls-GFP (green) stained for Vasa (blue) and LaminDm<sub>0</sub> (red). nlsGFP  
 595 was observed in cytoplasm in  $D1^{LL03310}/Df$  spermatogonia. (I) Quantification of spermatogonia

596 with cytoplasmic GFP (>1 $\mu$ m exclusions or pan-cytoplasmic) in  $DI^{LL03310}/+$  (n=810) and  
597  $DI^{LL03310}/Df$  (n=780) testes from two independent experiments. (J, K)  $DI^{LL03310}/+$  (J) and  
598  $DI^{LL03310}/Df$  (K) spermatogonia expressing ER-GFP marker (green) stained for Vasa (blue) and  
599 LaminDm<sub>0</sub> (red). Arrowhead points to ER marker-positive micronucleus. Arrows point to site of  
600 weak nuclear LaminDm<sub>0</sub> staining. (L, M) Control ( $DI^{LL03310}/+$ ) (L) and  $DI^{LL03310}/Df$  (M)  
601 spermatogonia stained for Vasa (blue) and LaminDm<sub>0</sub> (green) and Otefin (red). Arrowhead  
602 points to Otefin-containing micronucleus. Arrows point to site of weak nuclear LaminDm<sub>0</sub>  
603 staining.  
604

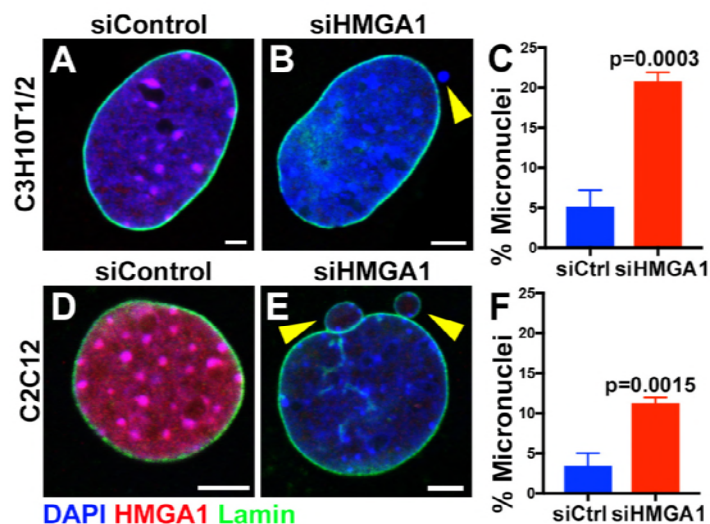

605  
606 **Figure 2 –figure supplement 1. Formation of micronuclei upon chromocenter disruption in**  
607 **C3H10T1/2 and C2C12 mouse cells.**  
608 (A, B) siControl (A) and siHMGA1 (B) transfected C3H10T1/2 cells stained for DAPI (blue),  
609 HMGA1 (red) and LaminB (green). Arrowhead indicates micronuclei. Bars: 5 $\mu$ m. (C)  
610 Quantification of micronuclei containing cells from siControl (n=291) and siHMGA1 (n=303)  
611 transfected cells from three independent experiments. P value from student's t-test is shown.  
612 Error bars are SD. (D, E) siControl (D) and siHMGA1 (E) transfected C2C12 cells stained for  
613 DAPI (blue), HMGA1 (red) and LaminB (green). Arrowhead indicates micronuclei. Bars: 5 $\mu$ m.  
614 (F) Quantification of micronuclei containing cells from siControl (n=953) and siHMGA1  
615 (n=699) transfected cells from three independent experiments. P value from student's t-test is  
616 shown. Error bars are SD.  
617

### Figure 3

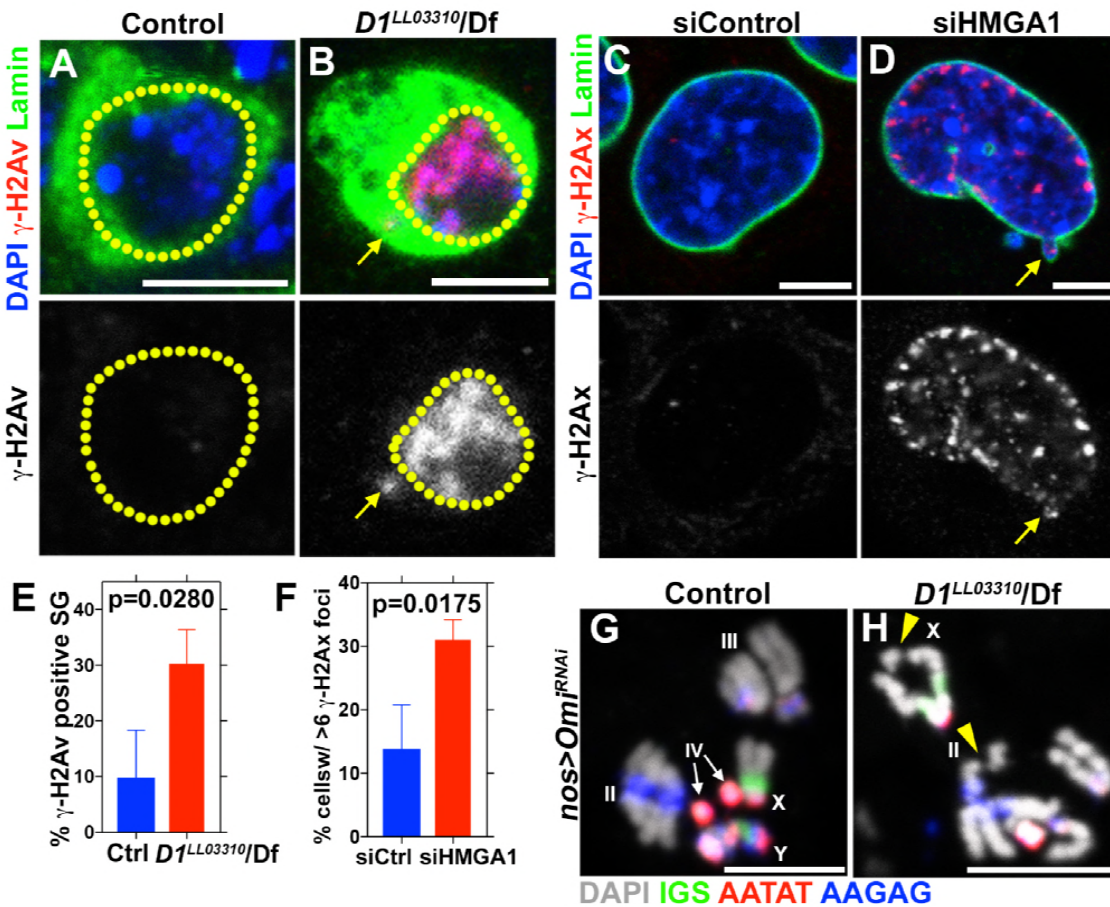

618  
 619 **Figure 3. D1 mutation/HMGA1 depletion leads to an increase in DNA damage.**  
 620 (A, B) Control ( $D1^{LL03310/+}$ ) (A) and  $D1^{LL03310}/Df$  (B) spermatogonia stained for DAPI (blue),  
 621 Vasa (green) and  $\gamma$ -H2Av (red). Dotted lines indicate nucleus and arrow points to DNA damage  
 622 in micronuclei. (C, D) siControl (C) and siHMGA1 (D) transfected MOVAS cells stained for  
 623 DAPI (blue),  $\gamma$ -H2Av (red) and LaminDm<sub>0</sub> (green). Arrow points to DNA damage in  
 624 micronuclei. (E) Quantification of  $\gamma$ -H2Av positive cells in  $D1^{LL03310/+}$  (n=317) and  $D1^{LL03310}/Df$   
 625 (n=242) spermatogonia from three independent experiments. (F) Quantification of cells  
 626 containing >6  $\gamma$ -H2Ax foci in siControl (n=304) and siHMGA1 (n=309) transfected cells from  
 627 three independent experiments. (G, H) FISH against the rDNA intergenic spacer (IGS) (green),  
 628 {AATAT}<sub>n</sub> (red) and {AAGAG}<sub>n</sub> (blue) on mitotic chromosomes from control ( $nos>Omi^{RNAi}$ ,  
 629 n=27) and  $D1$  mutant ( $nos>Omi^{RNAi}; D1^{LL03310}/Df$ , n=57) testes co-stained for DAPI (grey).  
 630 Arrowheads point to chromosome breaks.

631

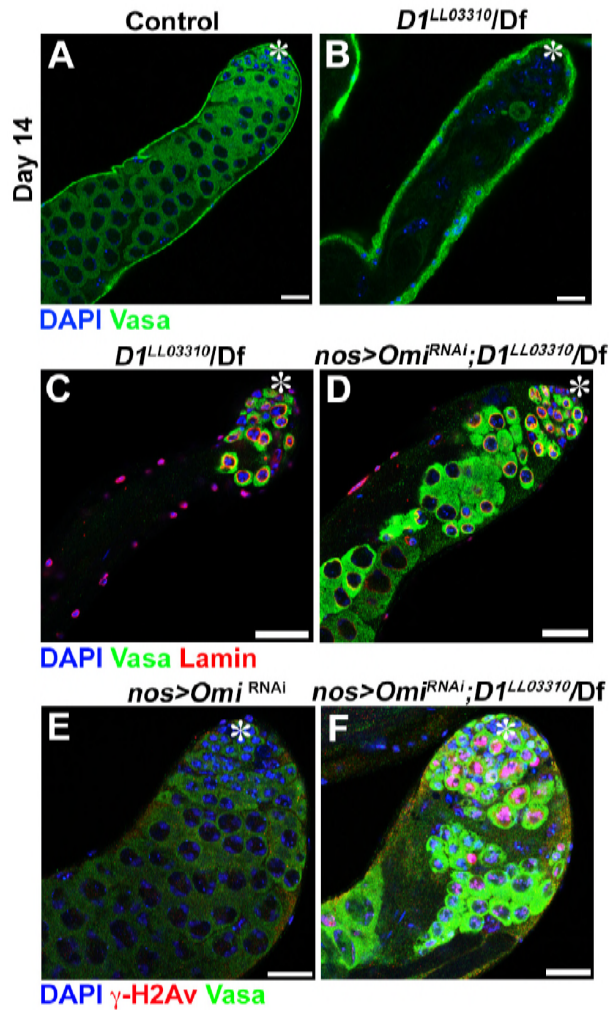

632

633 **Figure 3 –figure supplement 1. Chromocenter disruption results in germ cell death in**  
634 **Drosophila in an Omi-dependent manner.**

635 (A, B) Representative images of 14-day-old control ( $D1^{LL03310}/+$ , n=18) and  $D1^{LL03310}/Df$  (n=12)  
636 testes stained for DAPI (blue) and the germ cell marker, Vasa (green). Asterisk indicates apical  
637 tip. Bars: 25 $\mu$ m (C, D) Representative images of  $D1$  mutant testes ( $D1^{LL03310}/Df$ ) without (C) and  
638 with (D) germ cell death suppression by *Omi* knockdown ( $nos>Omi^{RNAi}$ ), stained for DAPI  
639 (blue), Vasa (green) and LaminDm<sub>0</sub> (red) at 7 days post eclosion. (E, F) Representative images  
640 of control ( $nos>Omi^{RNAi}$ ,  $D1^{LL03310}/+$ , n=10) and  $D1$  mutant ( $nos>Omi^{RNAi}$ ;  $D1^{LL03310}/Df$ , n=13)  
641 testes stained for DAPI (blue), Vasa (green) and  $\gamma$ -H2Av (red).

## Figure 4

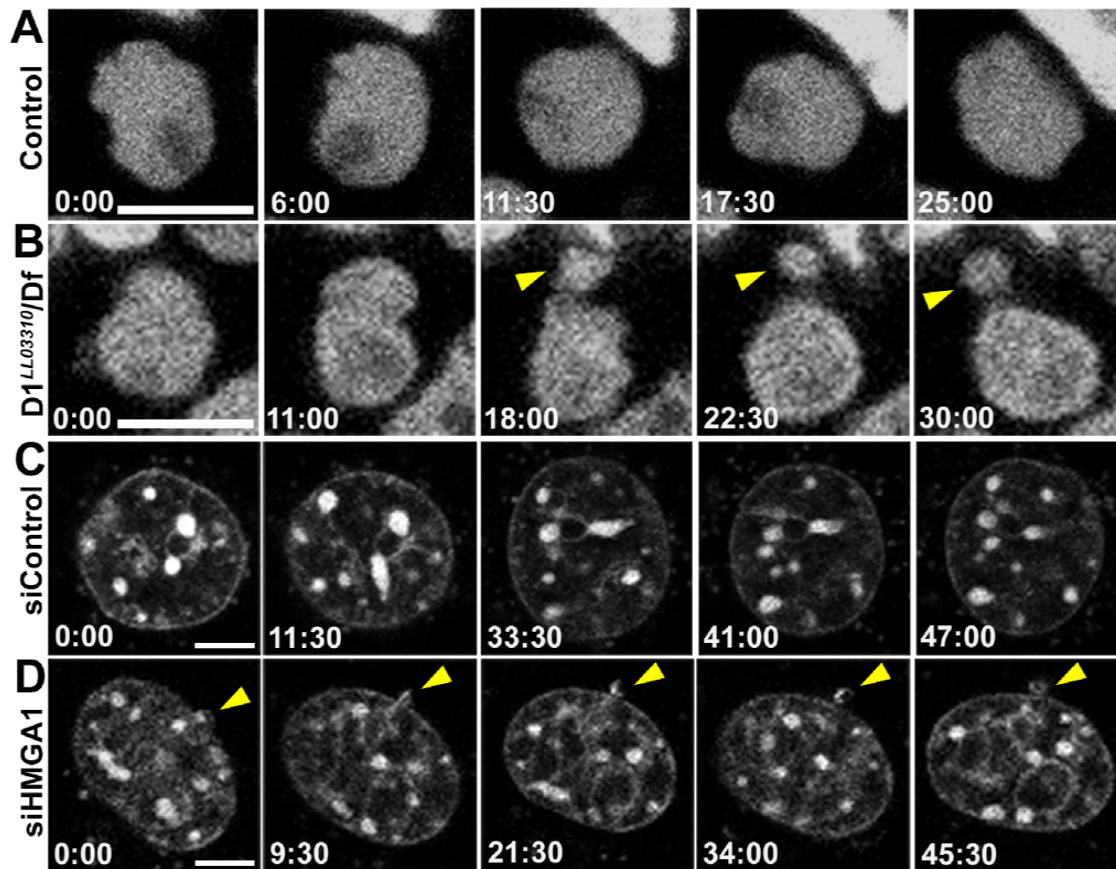

642

643 **Figure 4. D1/HMGA1 loss of function results in micronuclei formation due to nuclear**  
644 **budding during interphase.**

645 (A, B) Time-lapse live imaging of control (+/+) (A) and *D1<sup>LL03310</sup>/Df* (B) spermatogonial cells  
646 expressing Df31-GFP as a nuclear marker. (C, D) Time-lapse live imaging of siControl (C) and  
647 siHMGA1 (D) MOVAS cells stained with Hoechst 33342. Arrowheads indicate site of  
648 micronucleus budding. Time is indicated in mm:ss. Scale bars: 5 $\mu$ m.

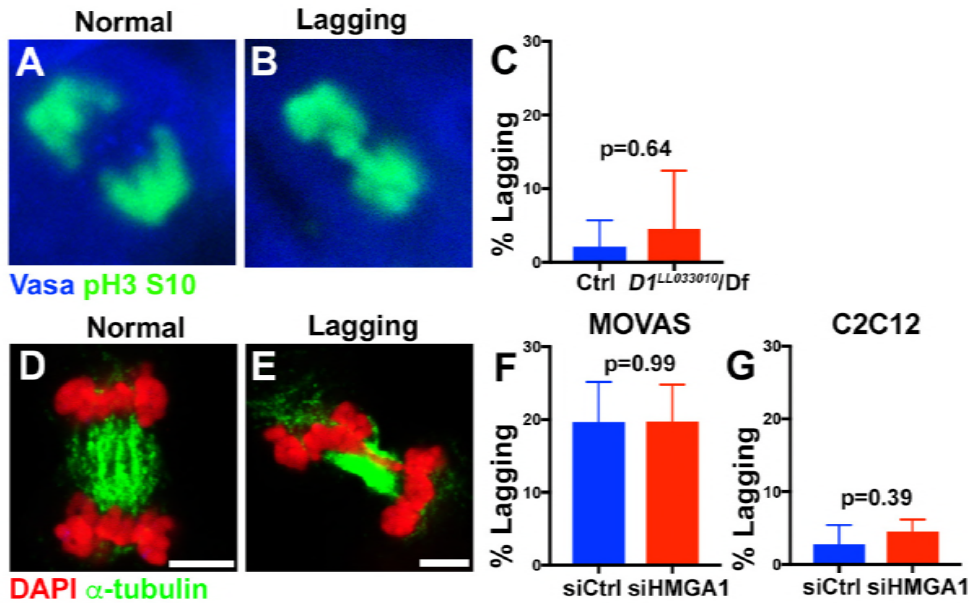

649

650 **Figure 4-figure supplement 1. Micronuclei formation upon chromocenter disruption is not**  
651 **a result of mitotic lagging chromosomes.**

652 (A, B) Examples of normal and lagging mitotic chromosomes in *Drosophila* spermatogonia  
653 stained for Vasa (blue) and pH3-S10 (green). (C) Quantification of spermatogonia with lagging  
654 chromosomes from control ( $D1^{LL033010}/+$ , n=43) and  $D1^{LL03310}/Df$  (n=47) from three independent  
655 experiments. P value from student's t test is shown. Error bars are SD. (D, E) Examples of  
656 normal and lagging mitotic chromosomes in mouse cells stained for DAPI (red) and  $\alpha$ -tubulin  
657 (green). Bars: 5 $\mu$ m. (F) Quantification of mitotic cells with lagging chromosomes from siControl  
658 (n=149) and siHMGA1 (n=174) transfected MOVAS cells from three independent experiments.  
659 (G) Quantification of mitotic cells with lagging chromosomes from siControl (n=110) and  
660 siHMGA1 (n=129) transfected C2C12 cells from three independent experiments.

661

**Figure 5**

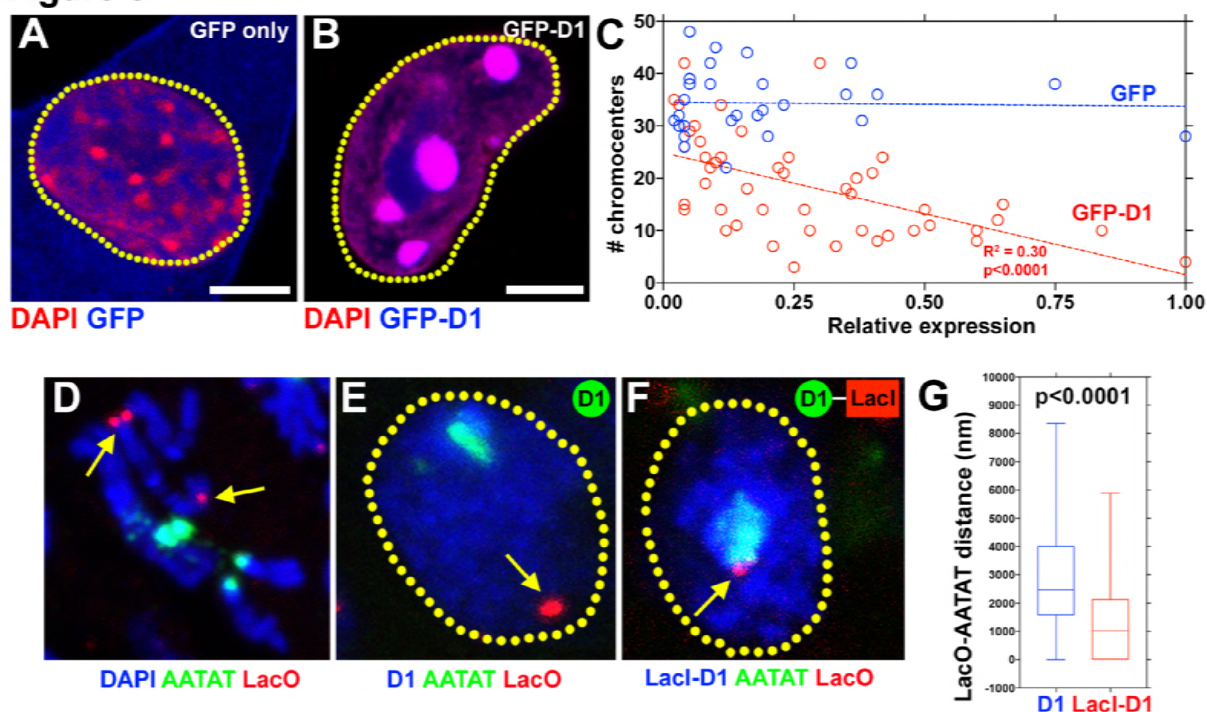

662  
663 **Figure 5. D1/HMGA1 bundles satellite DNA from heterologous chromosomes to form**  
664 **chromocenter.**  
665 (A, B) C2C12 cells expressing GFP only (blue) (A) or GFP-D1 (blue) (B) stained for DAPI  
666 (red). Dotted lines indicate nucleus. (C) Quantification of chromocenter number relative to  
667 expression level of GFP (n=29) or GFP-D1 (n=47). P value and  $R^2$  value are indicated from  
668 linear regression analysis. (D) FISH against LacO (red) and  $\{AATAT\}_n$  (green) on mitotic  
669 neuroblast chromosomes from the LacO strain stained for DAPI (blue), indicating the sites of  
670 LacO insertion (arrows). (E, F) FISH against LacO (red) and  $\{AATAT\}_n$  (green) in  
671 spermatogonia expressing GFP-D1 (blue) (E) or GFP-LacI-D1 (blue) (F). Arrows indicate  
672 location of LacO sequence. (G) AATAT-LacO distance (nm) in GFP-D1 (n=97) and GFP-LacI-  
673 D1 (n=69) expressing spermatogonia. P value from student's t-test is shown. Error bars: SD. All  
674 scale bars: 5 $\mu$ m.

675

676



Figure 6

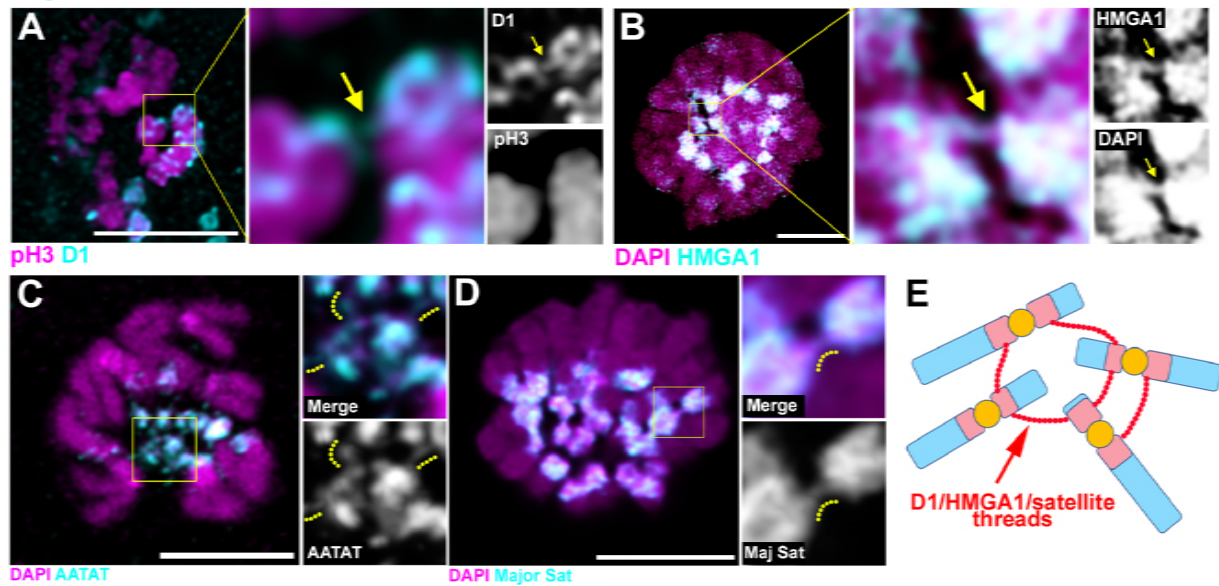

677  
678

**Figure 6. D1/HMGA1 and satellite DNA form chromatin threads that link chromosomes.**

679 (A) Deconvolution microscopy performed on *Drosophila* mitotic neuroblasts stained for D1  
680 (cyan) and pH3-S10 (magenta). Arrows in magnified images indicate D1-positive thread  
681 connecting two chromosomes. (B) Deconvolution microscopy performed on CSK-extracted  
682 RAW 264.7 macrophages stained for HMGA1 (cyan) and DAPI (magenta). Arrows in magnified  
683 images indicate HMGA1-positive thread connecting two chromosomes. (C) Deconvolution  
684 microscopy performed on neuroblast mitotic chromosomes stained for DAPI (magenta) and  
685 FISH against {AATAT}<sub>n</sub> (cyan) from a *Drosophila* strain containing AATAT-rich B  
686 chromosomes (Bauerly et al., 2014). Dotted lines in magnified images indicate AATAT-positive  
687 threads connecting heterologous chromosomes. (D) Deconvolution microscopy performed on  
688 RAW 264.7 macrophages stained for DAPI (magenta) and FISH against major satellite (cyan).  
689 Dotted lines in magnified images indicate major satellite-positive threads connecting two  
690 chromosomes. (E) The model of chromosome bundling by D1/HMGA1 and satellite DNA.
